# Supplementary material for: Synthesis and physicochemical properties of graphene/ZrO2 composite aerogels
Source: Royal Society of Chemistry journal article supplement (doi:10.1039/c4ra16024j), 2015-01-01
Supplement: c4ra16024j1.pdf [file c4ra16024j1.pdf]

## Supporting Information for

# Synthesis and physicochemical properties of the graphene/ZrO<sub>2</sub> composite aerogels

Dongman Guo<sup>1</sup>, Yun Lu<sup>1,\*</sup>, Yibo Zhao<sup>2</sup>, Xuetong Zhang<sup>1,3,\*</sup>

<sup>1</sup> School of Materials Science and Engineering, Beijing Institute of Technology, Beijing 100081, P. R. China. E-mail: luyun@bit.edu.cn; zhangxtchina@yahoo.com

<sup>2</sup> Aerospace Research Institute of Materials and Processing Technology, Beijing, 100076, P. R. China

<sup>3</sup> Suzhou Institute of Nano-Tech & Nano-Bionics, Chinese Academy of Sciences, Suzhou 215123, P. R. China

## Figures

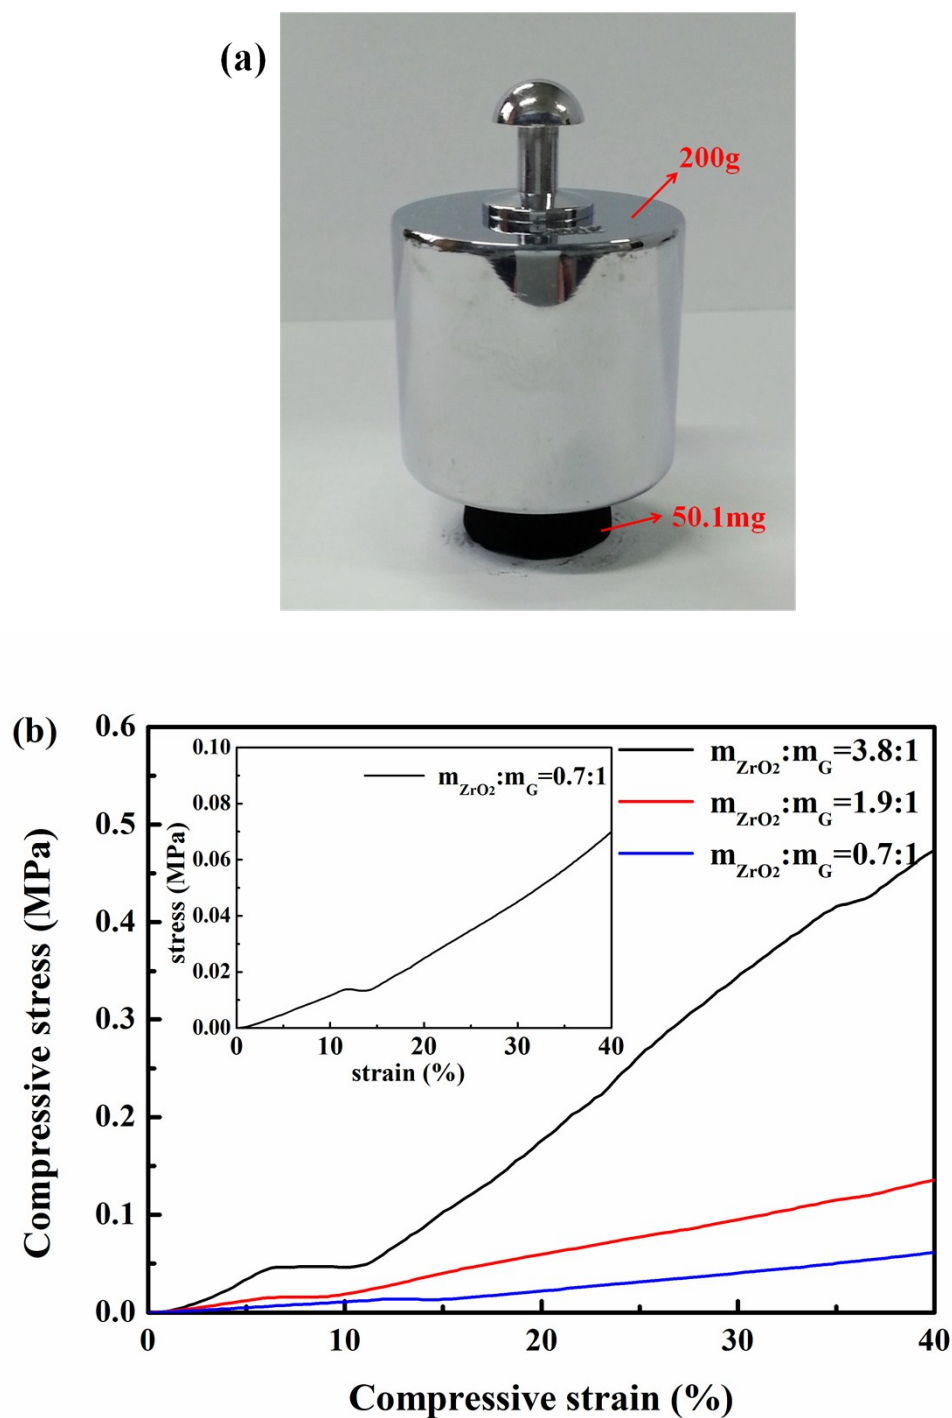

Figure S11. (a) Digital photo showing a 200 g counterpoise being supported by a 50.1 mg graphene/ZrO<sub>2</sub> composite aerogel pillar, (b) compressive stress-strain curves of the graphene/ZrO<sub>2</sub> composite aerogels with the different mass ratios.

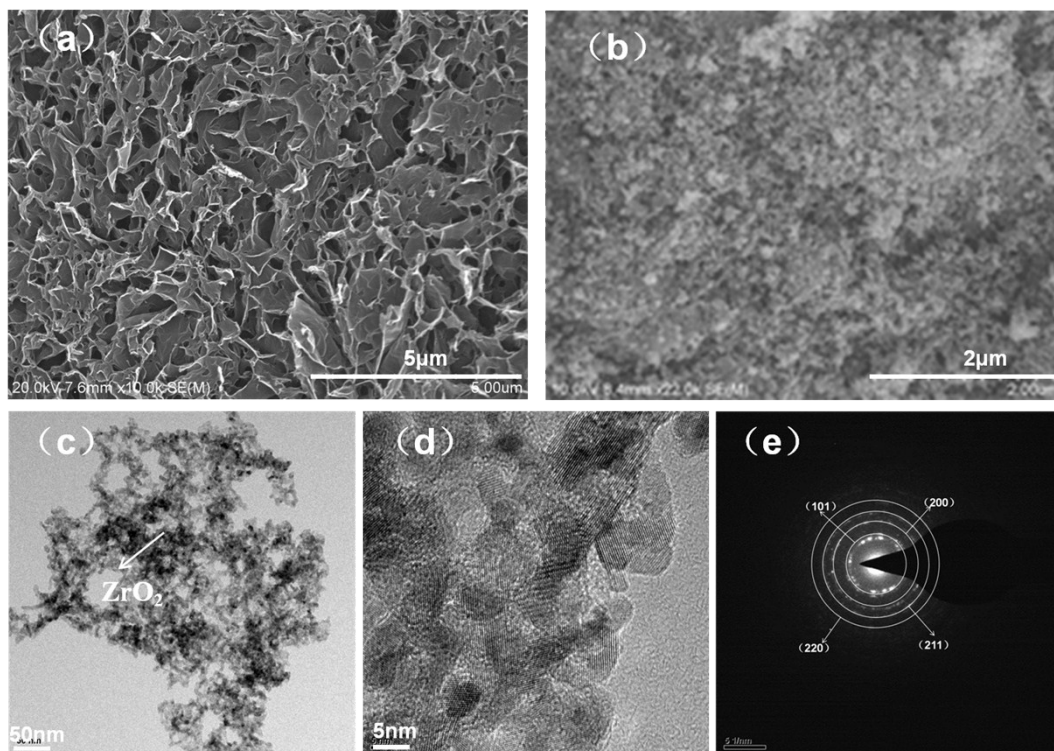

Figure S12. SEM images of graphene aerogel (a) and ZrO<sub>2</sub> aerogel (b), TEM images of graphene/ZrO<sub>2</sub> composite aerogels (c, d), and selected area electron diffraction (SAED) pattern of the ZrO<sub>2</sub> aerogel (e).

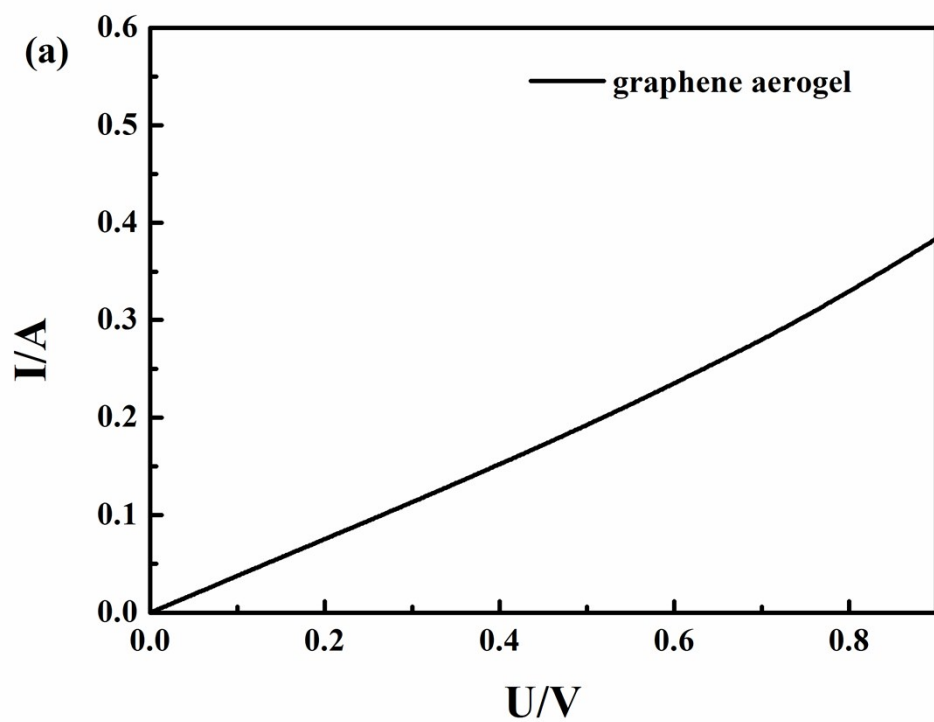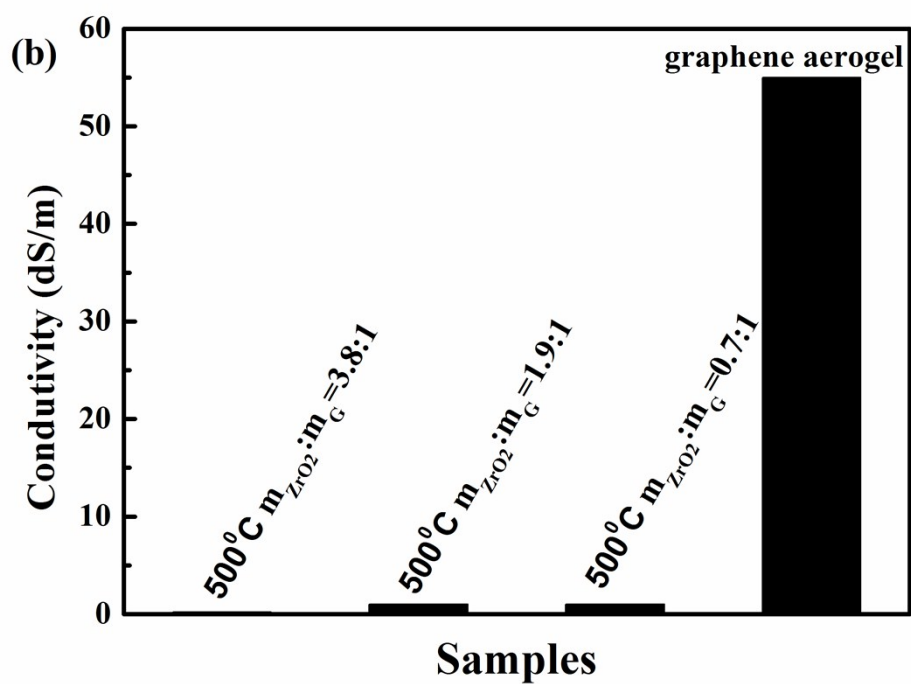

Figure SI3.  $I$ - $V$  curve of the graphene aerogel (a) and conductivity comparison between graphene aerogel and their composites with  $ZrO_2$  (b).

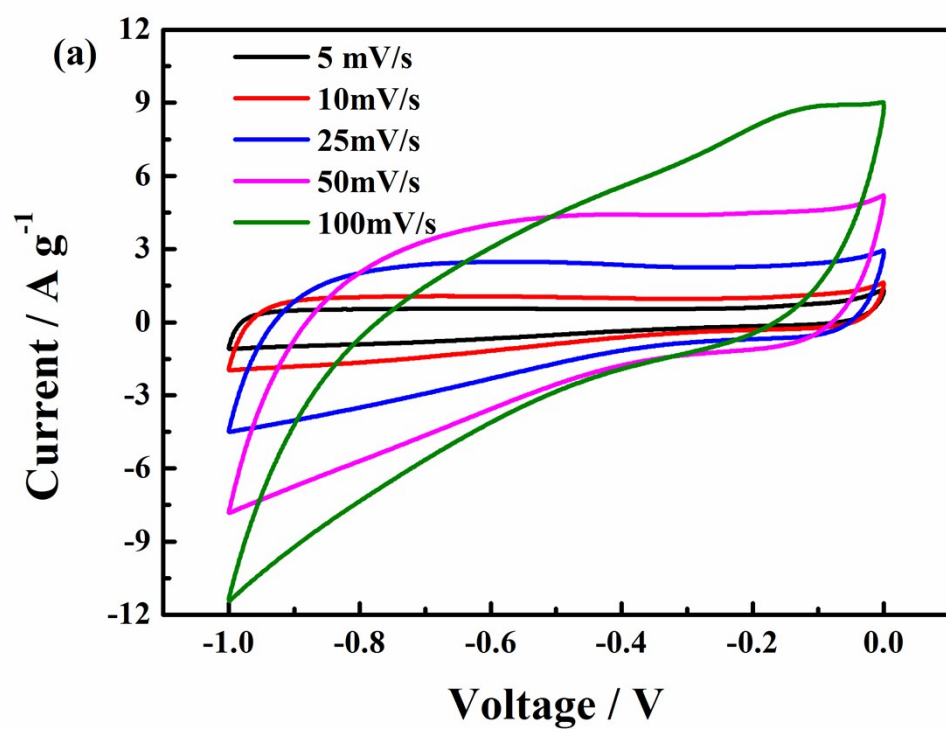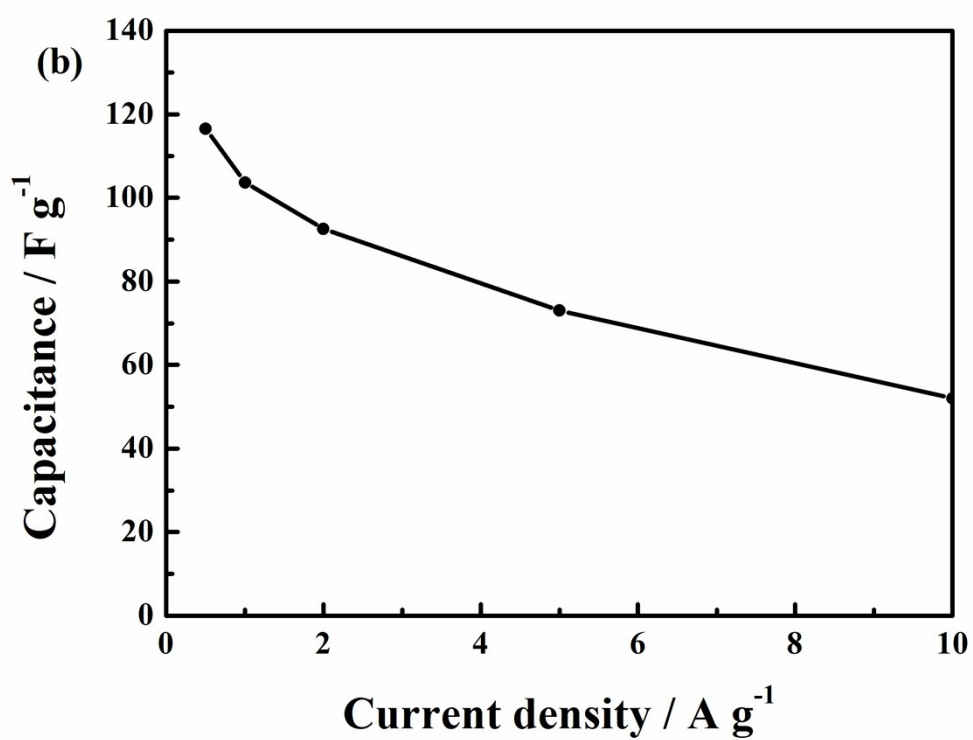

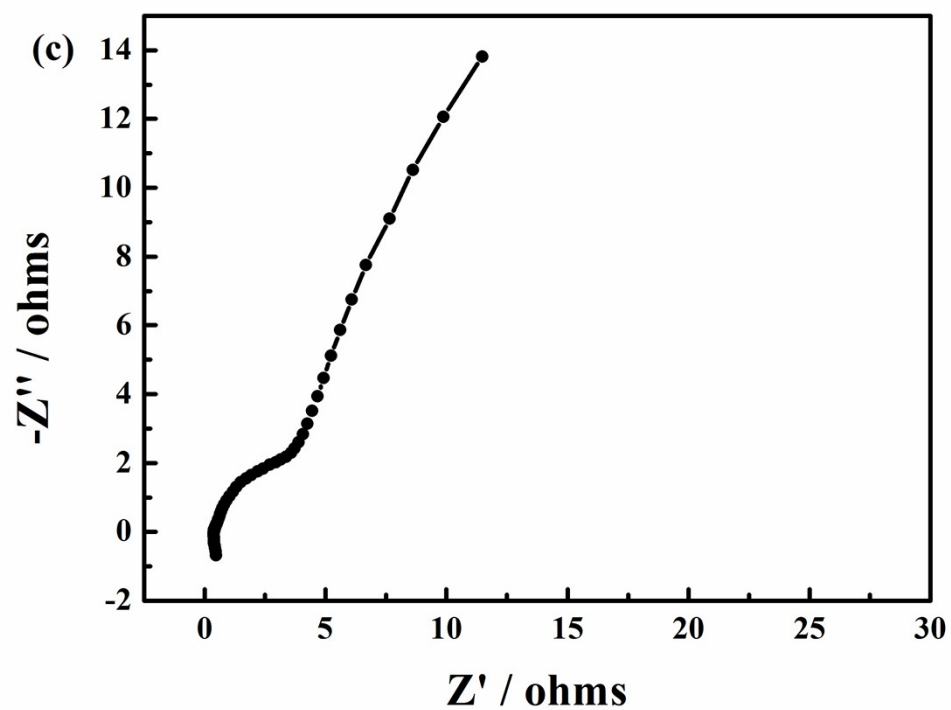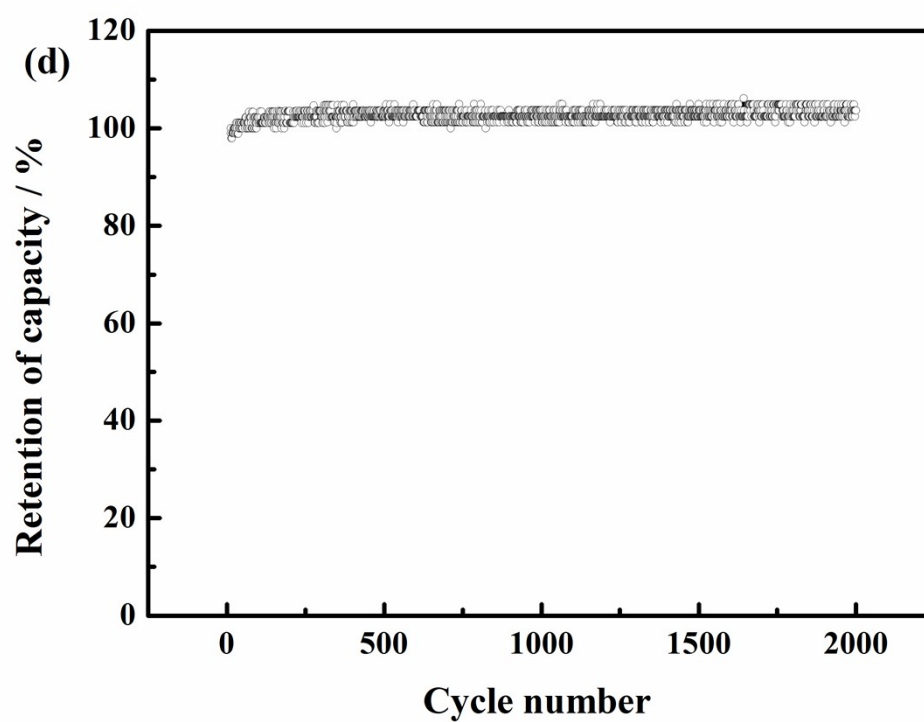

Figure SI4. Electrochemical investigation on the composite aerogels with the mass ratio of  $\text{ZrO}_2$  to graphene at 0.7: (a) Cyclic voltammetry at different scan rates, (b) the dependence of the specific capacitance on the current density, (c) Nyquist plot, and (d) the cycle performance.

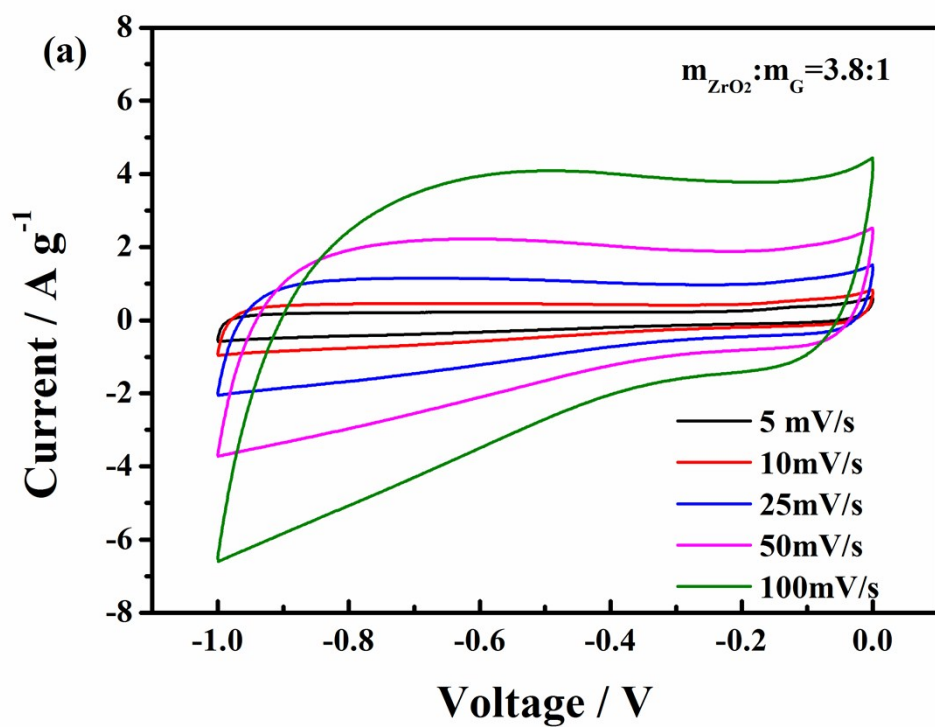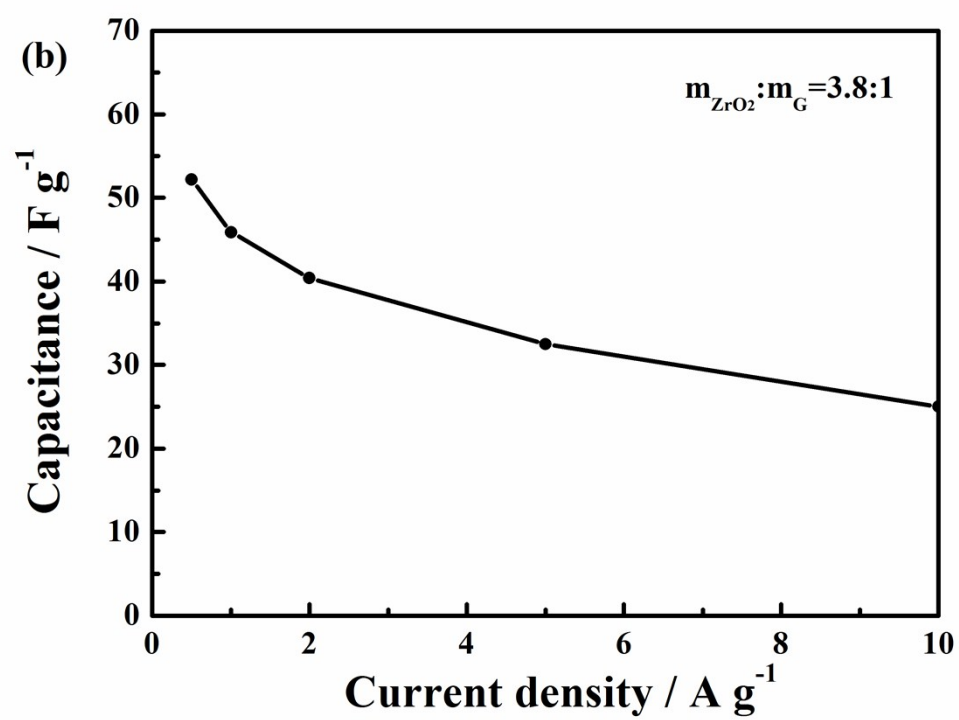

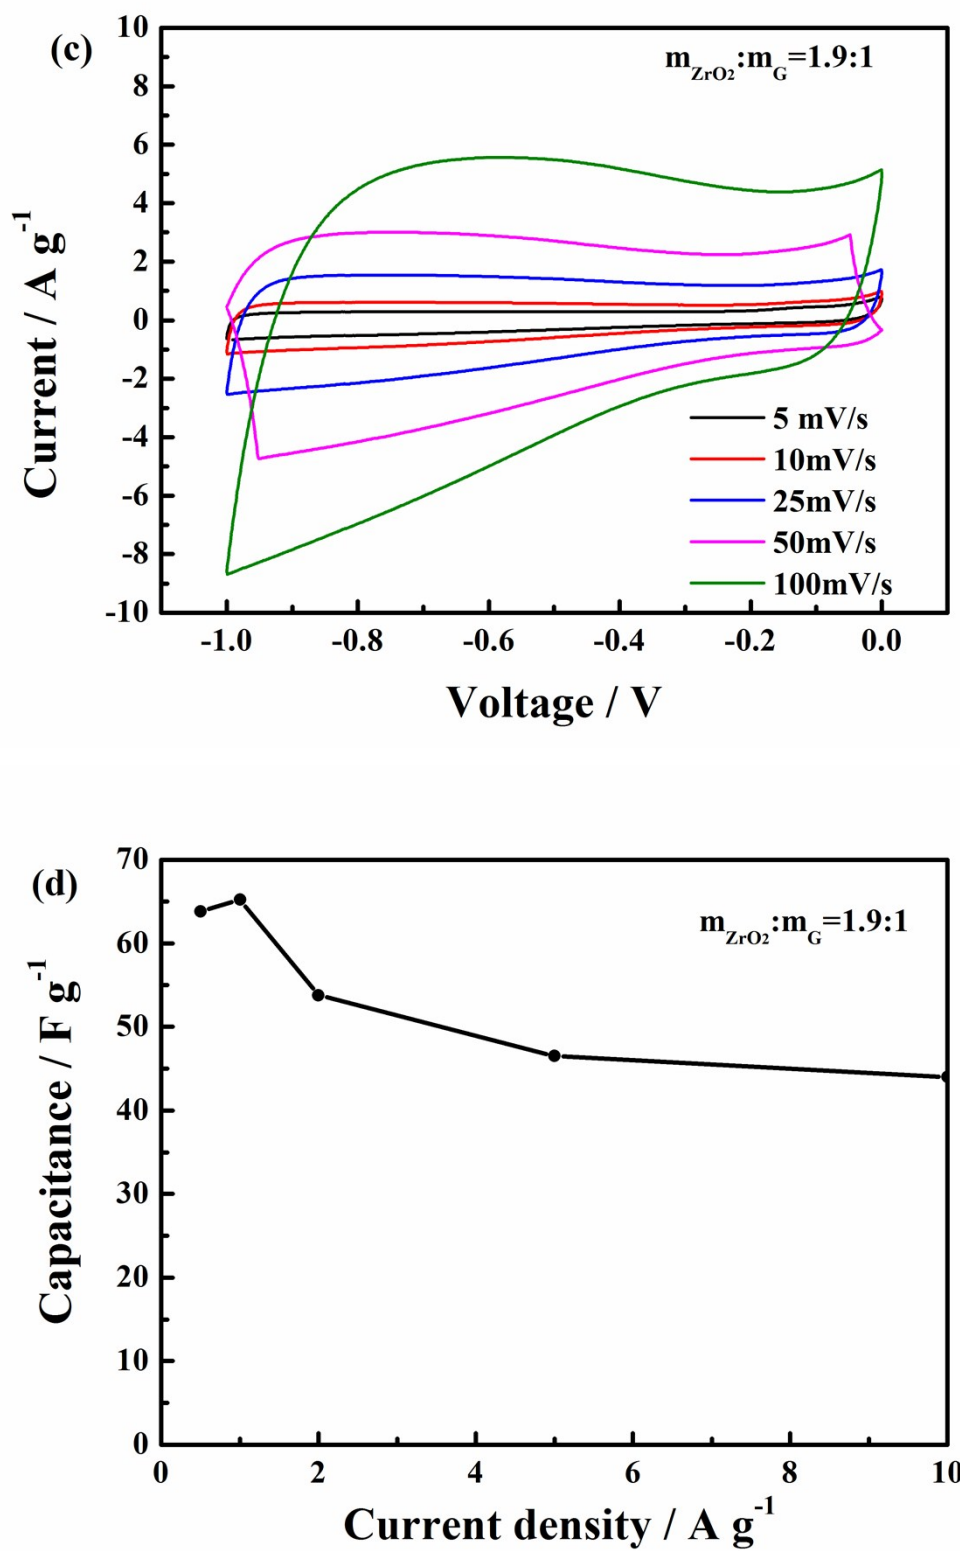

Figure SI5. (a), (c) Cyclic voltammetry curves of the graphene/ $\text{ZrO}_2$  composite aerogels with the different mass ratios at different scan rates; (b), (d) the dependence of the specific capacitance of the graphene/ $\text{ZrO}_2$  composite aerogels with the different mass ratios on the current density.



## Tables

**Table1 SI1 Mechanical properties of the graphene/ZrO<sub>2</sub> composite aerogels**

| Sample                                              | Yield strength (MPa) | Young's modulus (MPa) |
|-----------------------------------------------------|----------------------|-----------------------|
| m <sub>ZrO<sub>2</sub></sub> :m <sub>G</sub> =3.8:1 | 0.0455               | 1.16                  |
| m <sub>ZrO<sub>2</sub></sub> :m <sub>G</sub> =1.9:1 | 0.0156               | 0.29                  |
| m <sub>ZrO<sub>2</sub></sub> :m <sub>G</sub> =0.7:1 | 0.0138               | 0.12                  |

**Table1 SI2. The nitrogen sorption data of the graphene aerogel and graphene/ZrO<sub>2</sub> composite aerogels with different mass ratios of ZrO<sub>2</sub> to graphene.**

| Samples                                             | Graphene Content (wt%) | Apparent Density (mg cm <sup>-3</sup> ) | BET Surface Area (m <sup>2</sup> g <sup>-1</sup> ) | Porve Volume (cm <sup>3</sup> g <sup>-1</sup> ) |
|-----------------------------------------------------|------------------------|-----------------------------------------|----------------------------------------------------|-------------------------------------------------|
| m <sub>ZrO<sub>2</sub></sub> :m <sub>G</sub> =3.8:1 | 20.8                   | 70 ± 2                                  | 380                                                | 1.300                                           |
| m <sub>ZrO<sub>2</sub></sub> :m <sub>G</sub> =1.9:1 | 34.5                   | 40 ± 2                                  | 490                                                | 1.450                                           |
| m <sub>ZrO<sub>2</sub></sub> :m <sub>G</sub> =0.7:1 | 58.8                   | 20 ± 2                                  | 488                                                | 1.451                                           |
| Graphene aerogel                                    | 100                    | 200± 2                                  | 684                                                | 1.998                                           |

**Table1 SI3. Thermal conductivity of the graphene aerogel and graphene/ZrO<sub>2</sub> composite aerogels with different mass ratios of ZrO<sub>2</sub> to graphene.**

| Samples                                             | Test temperature (K) | Thermal conductivity (W m <sup>-1</sup> K <sup>-1</sup> ) |
|-----------------------------------------------------|----------------------|-----------------------------------------------------------|
| m <sub>ZrO<sub>2</sub></sub> :m <sub>G</sub> =3.8:1 | 307.9                | 0.0259 ± 0.0002                                           |
| m <sub>ZrO<sub>2</sub></sub> :m <sub>G</sub> =1.9:1 | 308.2                | 0.0251 ± 0.0002                                           |
| m <sub>ZrO<sub>2</sub></sub> :m <sub>G</sub> =0.7:1 | 308.5                | 0.0249 ± 0.0002                                           |
| Graphene aerogel                                    | 307.7                | 0.0485 ± 0.0002                                           |
